# Supplementary material for: Clinical characteristics and a diagnostic model for high-altitude pulmonary edema in habitual low altitude dwellers
Source: PeerJ. 2024 Sep 26;12:e18084. doi: 10.7717/peerj.18084 (PMC11439376; doi:10.7717/peerj.18084)
Supplement: Supplemental Information 3 [file peerj-12-18084-s003.xlsx]

## Sheet: Sheet1
categorical data	code
gender
male	1
female	2
Age(y)
18-34	1
35-49	2
50-64	3
65-	4
BMI(Kg/m2)
<18.5	1
18.5-24.9	2
25-	3
HAPE
HAPE patient	0
Non-HAPE patient	1
